# Supplementary material for: Evaluation of the Effect of an Olive Phenolic Extract on the Secondary Shelf Life of a Fresh Pesto
Source: MDPI journal article supplement (doi:10.3390/antiox13010128), 2024-01-20
Supplement: s1 [file s1]

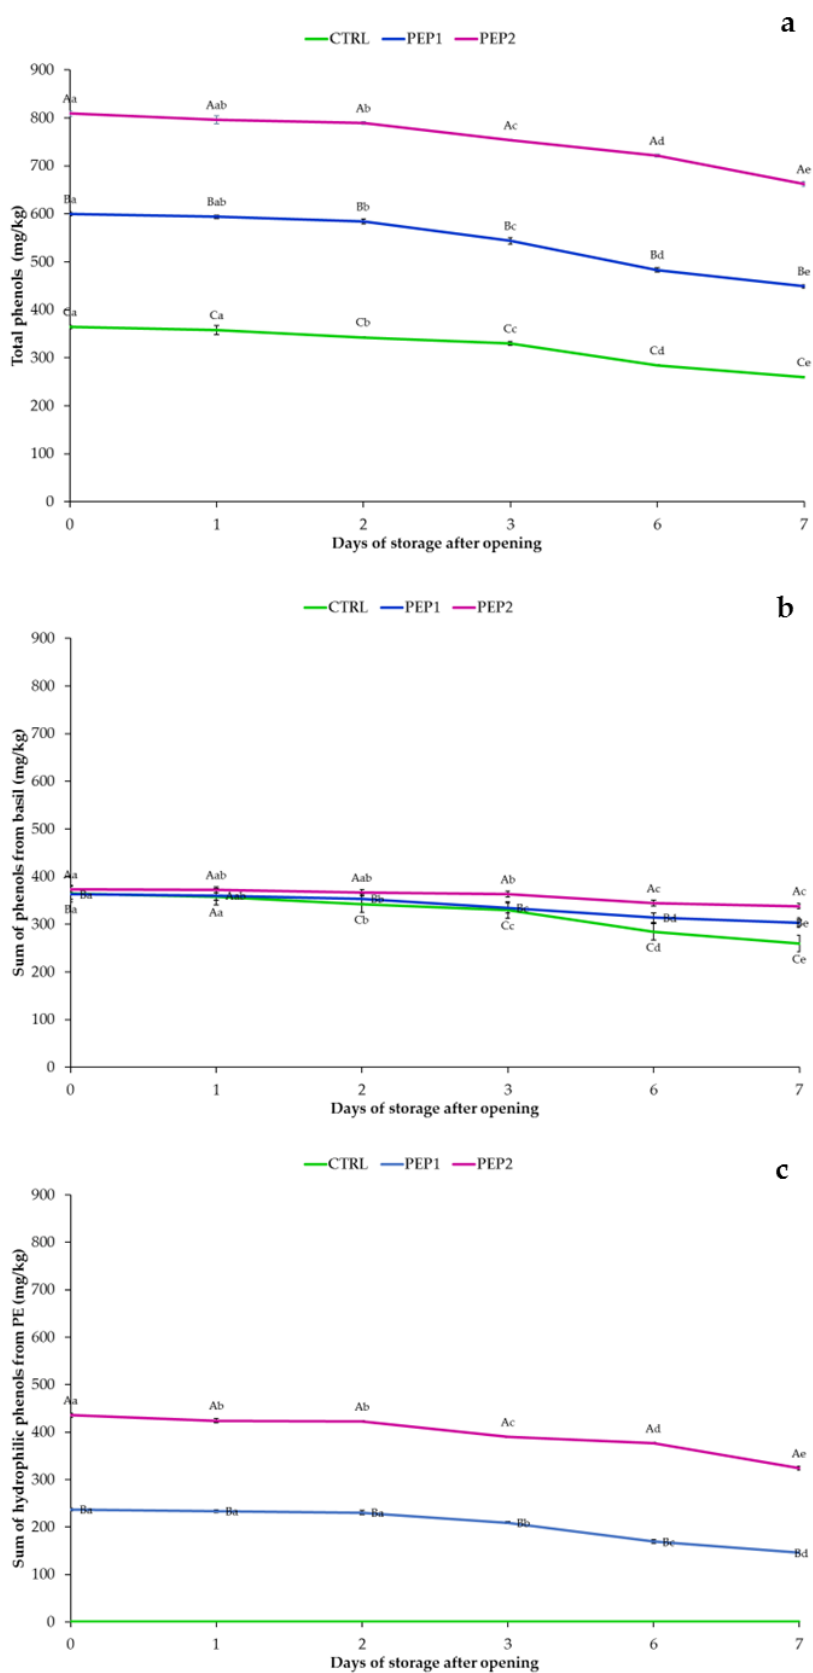

**Figure S1.** Evolution of total phenol concentrations (mg/kg) (a), sum of phenols from basil (mg/kg) (b), and sum of hydrophilic phenols from the PE (mg/kg) (c) in the pesto samples during the SSL (at opening (day 0) and 1, 2, 3, 6, and 7 days of storage after opening). Results are the mean of two different determinations. The values of sum of phenols from basil (mg/kg) are expressed as the sum of salvianic acid, caftaric acid, fertaric acid, caffeic acid, chicoric acid, rosmarinic acid and kaempferol; The values of sum of hydrophilic phenols from PE (mg/kg) are expressed as the sum

hydroxytyrosol (3,4-DHPEA), tyrosol (*p*-HPEA), verbascodide, oleacein (3,4-DHPEA-EDA) and oleochantal (*p*-HPEA-EDA). Legend: CTRL, control plus 0.06 g ascorbic acid/kg pesto and 1 g sorbic acid/kg pesto; PEP1, plus PE corresponding to 250 mg phenols/kg pesto; and PEP2, plus PE corresponding to 500 mg phenols/kg pesto.

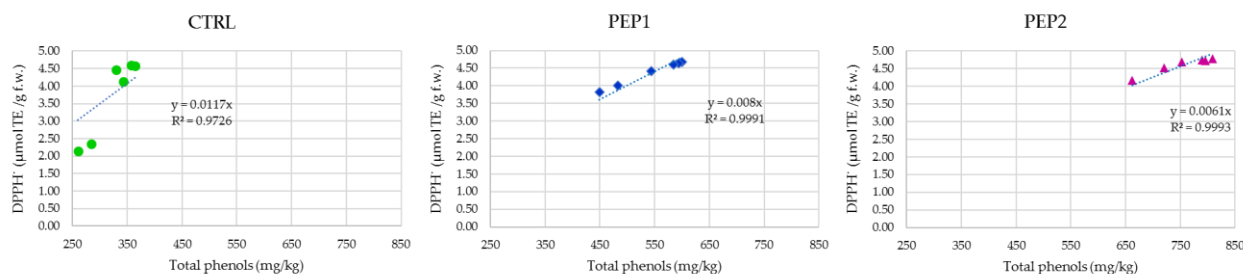

**Figure S2.** Correlation plot between DPPH· values (μmol TE/g f.w.) and total phenol concentration (mg/kg) of each pesto sample at different samplings (just after opening (day 0), and 1, 2, 3, 6, and 7 days of storage after opening). Legend: CTRL, control plus 0.06 g ascorbic acid/kg pesto and 1 g sorbic acid/kg pesto; PEP1, plus PE corresponding to 250 mg phenols/kg pesto; and PEP2, plus PE corresponding to 500 mg phenols/kg pesto.

**Table S1.** Chemical composition of PE employed for the manufacture of the experimental pesto.

|                                          |             |
|------------------------------------------|-------------|
| Hydroxytyrosol (3,4-DHPEA) (mg/g)*       | 80.9 ± 0.3  |
| Tyrosol ( <i>p</i> -HPEA) (mg/g)         | 14.6 ± 0.0  |
| Vanillic acid (mg/g)                     | 0.7 ± 0.0   |
| Verbascoside (mg/g)                      | 10.4 ± 0.2  |
| Oleacein (3,4-DHPEA-EDA) (mg/g)          | 636.0 ± 3.3 |
| Oleochantal ( <i>p</i> -HPEA-EDA) (mg/g) | 5.7 ± 0.1   |
| Total phenols (mg/g)                     | 748.3 ± 3.3 |
| Purity (%)                               | 74.8        |

\* Results are the mean of two different determinations ± standard deviation.

**Table S2.** Chemical and spectroscopic characteristics of phenolic compounds revealed by UHPLC-DAD-Q-TOF/MS analysis.

| Assignment       | Molecular                                      | retention time<br>(min) | [ M-H]     |          | Score | Difference<br>(ppm) |
|------------------|------------------------------------------------|-------------------------|------------|----------|-------|---------------------|
|                  | formula                                        |                         | Calculated | Expected |       |                     |
| Salvianic acid A | C <sub>9</sub> H <sub>10</sub> O <sub>5</sub>  | 1.86                    | 197.0455   | 197.0454 | 98.86 | -0.51               |
| Caftaric acid    | C <sub>13</sub> H <sub>12</sub> O <sub>9</sub> | 2.24                    | 311.0409   | 311.041  | 98.95 | 0.60                |
| Fertaric acid    | C <sub>14</sub> H <sub>14</sub> O <sub>9</sub> | 2.9                     | 325.0565   | 325.0563 | 98.81 | -0.40               |

|                    |                                                 |       |          |          |       |       |
|--------------------|-------------------------------------------------|-------|----------|----------|-------|-------|
| Caffeic acid       | C <sub>9</sub> H <sub>8</sub> O <sub>4</sub>    | 3.84  | 179.035  | 179.0351 | 99.81 | 0.83  |
| Chicoric acid      | C <sub>22</sub> H <sub>18</sub> O <sub>12</sub> | 5.77  | 473.0725 | 473.0729 | 99.45 | 0.84  |
| Salvianolic acid E | C <sub>36</sub> H <sub>30</sub> O <sub>16</sub> | 6.80  | 717.1461 | 717.1456 | 97.67 | -0.65 |
| Rosmarinic acid    | C <sub>18</sub> H <sub>16</sub> O <sub>8</sub>  | 7.28  | 359.0772 | 359.0773 | 99.61 | 0.38  |
| Salvianolic acid L | C <sub>36</sub> H <sub>30</sub> O <sub>16</sub> | 7.95  | 717.1461 | 717.1455 | 97.19 | -0.93 |
| Salvianolic acid B | C <sub>36</sub> H <sub>30</sub> O <sub>16</sub> | 10.04 | 717.1461 | 717.1451 | 97.19 | -0.98 |

[41] Lee, J.; Chan, B.L.S.; Mitchell, A.E. Identification/Quantification of Free and Bound Phenolic Acids in Peel and Pulp of Apples (*Malus domestica*) Using High Resolution Mass Spectrometry (HRMS). *Food Chem.* **2017**, 215, 301–310.

**Table S3.** Hydrophilic phenols concentration (mg/kg) of phenolic extract (PE) in pesto samples just after opening (day 0).

|                                    | CTRL | PEP1       | PEP2       |
|------------------------------------|------|------------|------------|
| Hydroxytyrosol (3,4-DHPEA)*        | n.d. | 43.6±2.5B  | 76±1.1A    |
| Tyrosol ( <i>p</i> -HPEA)          | n.d. | 4.1±0.1B   | 7.5±0.3A   |
| Verbascoside                       | n.d. | 3.2±0.3B   | 6.5±0.5A   |
| Oleacein (3,4-DHPEA-EDA)           | n.d. | 185.8±0.6B | 343±4.4A   |
| Oleochantal ( <i>p</i> -HPEA-EDA)  | n.d. | n.d.       | 2.4±0.2A   |
| Sum of hydrophilic phenols from PE | n.d. | 236.6±2.6B | 435.5±4.6A |

\* Results are the mean of two independent analytical determinations ± standard deviation. Different uppercase letters (A-B) in the row, represent significant differences among the formulations (p <0.05). n.d. not detected. Legend: CTRL, Control plus 0,06 g/kg ascorbic acid and 1 g/kg sorbic acid; PEP1, plus PE equivalent to 250 mg phenols/kg of pesto; and PEP2, plus PE equivalent to 500 mg phenols/kg of pesto.

**Table S4.** Changes in fatty acid composition of oil extract from pesto samples over time (just after opening (day 0) and 1, 2, 3, 6, and 7 days of storage after opening).

| Days of storage after opening      | 0         |           |           | 1         |           |           | 2         |           |           | 3         |           |           | 6         |           |           | 7         |           |           |
|------------------------------------|-----------|-----------|-----------|-----------|-----------|-----------|-----------|-----------|-----------|-----------|-----------|-----------|-----------|-----------|-----------|-----------|-----------|-----------|
| Compound/Samples                   | CT RL     | PEP 1     | PEP 2     | CT RL     | PEP 1     | PEP 2     | CT RL     | PEP 1     | PEP 2     | CT RL     | PEP 1     | PEP 2     | CT RL     | PEP 1     | PEP 2     | CT RL     | PEP 1     | PEP 2     |
| Palmitic acid (C16: 0)             | 14.1 ±0.2 | 14.2 ±0.0 | 14.2 ±0.3 | 14.1 ±0.2 | 14.2 ±0.7 | 14.2 ±0   | 14.1 ±0.9 | 14.2 ±0   | 14.2 ±0.5 | 14.1 ±0.6 | 14.2 ±0.4 | 14.2 ±0.2 | 14.1 ±0.2 | 14.2 ±0   | 14.2 ±0   | 14.2 ±0   | 14.2 ±0.1 | 14.2 ±0   |
| Palmitoleic acid (C16: 1)          | 0.2±0.0   | 0.2±0.0   | 0.2±0.0   | 0.2±0.0   | 0.2±0.1   | 0.2±0.0   | 0.2±0.0   | 0.2±0.0   | 0.2±0.0   | 0.2±0.0   | 0.2±0.0   | 0.2±0.0   | 0.2±0.0   | 0.2±0.0   | 0.2±0.0   | 0.2±0.0   | 0.2±0.0   | 0.1±0.0   |
| Margaric acid (C17: 0)             | 0.1±0.0   | 0.1±0.0   | 0.1±0.0   | 0.1±0.0   | 0.1±0.1   | 0.1±0.0   | 0.1±0.0   | 0.1±0.0   | 0.1±0.0   | 0.1±0.0   | 0.1±0.0   | 0.1±0.0   | 0.1±0.0   | 0.1±0.0   | 0.1±0.0   | 0.1±0.0   | 0.1±0.0   | 0.1±0.0   |
| cis-10-Heptadecenoic acid (C17: 1) | 0.1±0.0   | n.d.      | n.d.      | 0±0       | n.d.      | n.d.      | 0±0       | n.d.      | n.d.      |
| Stearic acid (C18: 0)              | 4.4±0.0   | 4.4±0.0   | 4.4±0.0   | 4.4±0.0   | 4.5±0.2   | 4.5±0.2   | 4.4±0.1   | 4.4±0.0   | 4.4±0.0   | 4.3±0.1   | 4.4±0.1   | 4.4±0.1   | 4.3±0.0   | 4.4±0.0   | 4.4±0.0   | 4.3±0.0   | 4.4±0.0   | 4.4±0.0   |
| Oleic acid (C18: 1n9c)             | 32.7 ±0.1 | 32.7 ±0.1 | 32.7 ±0.6 | 32.7 ±0.1 | 32.7 ±1.0 | 32.7 ±0   | 32.7 ±0.3 | 32.7 ±0.1 | 32.7 ±0.7 | 32.7 ±0.2 | 32.7 ±0.8 | 32.7 ±0.3 | 32.7 ±0.1 | 32.7 ±0   | 32.8 ±0   | 32.7 ±0.1 | 32.7 ±0.1 | 32.8 ±0.1 |
| Linoleic acid (C18: 2n6c)          | 47.3 ±0.1 | 47.3 ±0.1 | 47.3 ±0.2 | 47.3 ±0.1 | 47.3 ±0.2 | 47.3 ±0   | 47.3 ±0.5 | 47.3 ±0.1 | 47.3 ±0.2 | 47.3 ±0.3 | 47.3 ±0.2 | 47.3 ±0.1 | 47.3 ±0.1 | 47.3 ±0   | 47.3 ±0.0 | 47.3 ±0   | 47.3 ±0   | 47.2 ±0.0 |
| Linolenic acid (C18: 3n3)          | 0.7±0.0   | 0.7±0.0   | 0.7±0.0   | 0.7±0.0   | 0.7±0.0   | 0.7±0.0   | 0.7±0.0   | 0.7±0.0   | 0.7±0.0   | 0.7±0.0   | 0.7±0.0   | 0.8±0.0   | 0.7±0.2   | 0.7±0.0   | 0.8±0.0   | 0.7±0.0   | 0.8±0.0   | 0.8±0.0   |
| Arachidic acid (C20: 0)            | 0.3±0.0   | 0.3±0.0   | 0.2±0.0   | 0.3±0.0   | 0.2±0.0   | 0.2±0.0   | 0.3±0.0   | 0.3±0.0   | 0.3±0.0   | 0.3±0.0   | 0.3±0.0   | 0.2±0.0   | 0.3±0.2   | 0.2±0.0   | 0.2±0.0   | 0.3±0.0   | 0.2±0.0   | 0.2±0.0   |
| cis-11-Eicosenoic acid (C20: 1n9)  | 0.2±0.0   | 0.1±0.0   | 0.1±0.0   | 0.2±0.0   | 0.1±0.0   | 0.1±0.0   | 0.2±0.0   | 0.2±0.0   | 0.2±0.0   | 0.2±0.0   | 0.1±0.0   | 0.1±0.0   | 0.2±0.0   | 0.1±0.0   | 0.1±0.0   | 0.2±0.0   | 0.2±0.0   | 0.1±0.0   |
| SFA                                | 18.9 ±0.2 | 18.9 ±0.0 | 19.0 ±0.3 | 18.9 ±0.2 | 19±0.7    | 19.0 ±0.0 | 18.9 ±0.9 | 18.9 ±0.0 | 19.0 ±0.5 | 18.9 ±0.6 | 18.9 ±0.4 | 18.9 ±0.2 | 18.8 ±0.3 | 18.9 ±0   | 18.9 ±0.0 | 18.9 ±0   | 18.9 ±0.1 | 18.9 ±0.1 |
| MUFA                               | 33.1 ±0.1 | 33.1 ±0.1 | 33.0 ±0.6 | 33.1 ±0.1 | 33.1 ±1.0 | 33.0 ±0.1 | 33.1 ±0.3 | 33.1 ±0.1 | 33.1 ±0.7 | 33.1 ±0.2 | 33.1 ±0.8 | 33.0 ±0.3 | 33.1 ±0.1 | 33.1 ±0   | 33.0 ±0   | 33.1 ±0   | 33.1 ±0.1 | 33.0 ±0.1 |
| PUFA                               | 48.0 ±0.1 | 48.0 ±0.1 | 48.0 ±0.2 | 48.0 ±0.1 | 48.0 ±0.2 | 48.0 ±0.0 | 48.0 ±0.5 | 48.0 ±0.1 | 48.0 ±0.2 | 48.0 ±0.3 | 48.0 ±0.2 | 48.0 ±0.1 | 48.0 ±0.3 | 48.0 ±0.0 | 48.0 ±0.0 | 48.0 ±0   | 48.0 ±0.0 | 48.0 ±0.0 |

Results are the mean of two independent analytical determinations ± standard deviation. There is no significant difference among the formulation ( $p < 0.05$ ) and within each formulation during the days of storage ( $p < 0.05$ ). Legend: CTRL, Control plus 0,06 g/kg ascorbic acid and 1 g/kg sorbic acid; PEP1, plus PE1 equivalent to 250 mg phenols/kg of pesto; and PEP2, plus PE2 equivalent to 500 mg phenols/kg of pesto.

**Table S5.** Evolution of volatile compounds ( $\mu\text{g/kg}$ ) of pesto samples during SSL (at opening ((day 0) and 1, 2, 3, 6, and 7 days of storage after opening).

| Days of storage after opening | 0             | 1            | 2            | 3            | 6             | 7             |
|-------------------------------|---------------|--------------|--------------|--------------|---------------|---------------|
|                               | CTRL          |              |              |              |               |               |
| Aldehydes*                    |               |              |              |              |               |               |
| Pentanal                      | 23.2±1.1Bc    | 28.9±0.8Bb   | 27.9±2.6Bb   | 27.6±2.6Bb   | 31.6±1.9Ab    | 37.2±0.3Aa    |
| Hexanal                       | 5.8±0.2Ae     | 9.3±0.1Ad    | 14.1±1Ac     | 15±0.3Ac     | 19.7±0.2Ab    | 38.5±1.9Aa    |
| (E)-2-Hexenal                 | 416.8±12.5Aa  | 389.6±1Bab   | 384.7±2.8Abc | 372.7±4.5Abc | 373.1±17.4Abc | 360.5±2.4Ac   |
| (E)-2-Heptenal                | 11.6±0.6Acd   | 10.5±0.7Ad   | 12±1.1Bcd    | 14.6±0.6Ac   | 20.5±0.3Bb    | 73.9±2.5Aa    |
| Nonanal                       | 1.7±0.2Ac     | 1.6±0Ac      | 1.7±0.2Ac    | 1.9±0Ac      | 2.5±0.1Ab     | 3.8±0.1Aa     |
| Benzaldehyde                  | 8.5±0.4Aa     | 8.4±0.3Aa    | 8.3±0.5Aa    | 8.0±0.4Aa    | 8.1±0.3Aa     | 8.3±0.3Aa     |
| Sum of aldehydes              | 467.5±12.6Aa  | 448.3±1.4Aa  | 448.7±4.1Aa  | 439.6±5.2Aa  | 455.5±17.6Aa  | 522.1±4Ab     |
| Alcohols                      |               |              |              |              |               |               |
| 3-Methyl-1-butanol            | 18±0.9Aa      | 17.5±0Aa     | 17.6±0Ba     | 17±1.1Aa     | 17.5±1.2Aa    | 17.4±0.1Aa    |
| 1-Pentanol                    | 38.2±1.5Bab   | 38.8±0.8Ba   | 35.8±0.8Abc  | 33.6±0.2Bc   | 38.4±1.2Aa    | 28.3±0Ad      |
| 1-Octen-3-ol                  | 177.8±13.2Aab | 172.4±0.1Ab  | 174.4±1Ab    | 187.2±4.6Aab | 186.4±5.2Aab  | 194.4±0.5Aa   |
| 1-Hexanol                     | 19.1±1Bb      | 22.4±0.3Ba   | 14.9±0.2Cc   | 15.6±0Cc     | 15.8±0.6Bc    | 11.5±0.2Bd    |
| Benzyl alcohol                | 10.7±0.4Aa    | 10.9±0.2Aa   | 10±0.4Aa     | 9.9±0.1Aa    | 9.9±0.8Aa     | 8.1±0.2Bb     |
| Phenylethyl alcohol           | 7±0.3Ba       | 7.3±0.2Aa    | 6.5±0.3Bab   | 6.4±0Cab     | 6±0.6Cb       | 5.4±0.2Bb     |
| Sum of alcohols               | 270.8±13.4Aa  | 269.3±0.9Aa  | 259.2±1.3Aa  | 269.7±4.7Aa  | 274±5.6Aa     | 265.1±0.6Aa   |
| Esters                        |               |              |              |              |               |               |
| Methyl butanoate              | 22.8±1Aa      | 21.9±0.6ABa  | 20.3±0.2Ba   | 22.5±0.4Aa   | 23.5±2.6Aa    | 21±1Ba        |
| Ethyl butanoate               | 48.4±1.5Bc    | 46.6±0.3Cc   | 48.5±0.5Cc   | 66.7±0.5Aa   | 53.9±2.9Ab    | 49.6±0.4ABc   |
| Ethyl hexanoate               | 52.6±2.9Aa    | 52.4±1.1Aa   | 54.1±0.3Aa   | 52.2±0Ba     | 47±6.4Aa      | 46.8±1.2Ba    |
| Ethyl octanoate               | 8.4±0.7Ba     | 8.7±0.2Aa    | 8.3±0.4Aa    | 8.9±0Aa      | 8.2±0.9Aa     | 8.4±0.4Aa     |
| Sum of esters                 | 132.2±3.5Aa   | 129.5±1.4Aa  | 131.2±0.7Aa  | 150.4±0.6Ab  | 132.5±7.5Aa   | 125.8±1.7Aa   |
| Terpenes                      |               |              |              |              |               |               |
| α-Pinene                      | 276.5±5.6Aa   | 256.4±1.2Ab  | 241.5±7.1Abc | 226.7±3.3Acd | 238±0.7Bbc    | 216.4±15Ad    |
| Camphene                      | 18.5±0.5Bab   | 17.7±0.4Bb   | 19±0.2Ba     | 18.1±0.3Cab  | 18.5±0.2Bab   | 18.8±0.6Aa    |
| β-Pinene                      | 195.7±4.8Aab  | 184.3±2.5Ac  | 203.1±1.3Aa  | 191.1±0.5Ab  | 203.5±6Aa     | 194.5±3.3Ab   |
| β-Thujene                     | 118.6±10.2Aab | 112.3±2.3Bab | 122.4±1.4Bb  | 124±1.4Aab   | 122.9±1.3Aab  | 125.1±1.8Aa   |
| Sabinene                      | 130.2±5.1Aab  | 131.6±0.1Ba  | 126.1±3.5Ba  | 118±0.4Bc    | 120.2±2.8Abc  | 115.1±5.4Ac   |
| β-Myrcene                     | 410.6±14.5Aa  | 411.2±4Ba    | 401.4±1.4Aa  | 405±3.8Aa    | 416.1±45.3Aa  | 416.9±7.1Aa   |
| Limonene                      | 139.8±5.2Aa   | 144.5±0.1Aa  | 132.1±0.5Aab | 113.6±2.2Bc  | 117.7±11.7Bc  | 121.2±1.3ABbc |
| Eucalyptol                    | 649.1±11.5Aa  | 657.4±3.9Aa  | 627.3±5.9Ab  | 626.5±9.1Ab  | 605.6±22.3Bbc | 610.3±5.3Ac   |
| β-Ocimene                     | 248±9.9Bb     | 257.2±1.3Bb  | 233.7±2Ac    | 273.5±6Aab   | 267.4±14.2ABa | 282.2±0.8Aa   |
| Terpinolene                   | 24.6±1.5Abc   | 20.4±1.7Bd   | 28.3±1.3Aa   | 27.6±0.3Bab  | 24.1±1.4Ac    | 19.3±0.4Ad    |

|                           |               |               |               |               |               |               |
|---------------------------|---------------|---------------|---------------|---------------|---------------|---------------|
| Linalool                  | 790.7±21.8Aa  | 773.9±3.9Aa   | 773.3±22.8Aa  | 782±5.2Aa     | 769.2±17.6Aa  | 763.6±16.7Aa  |
| Sum of terpenes           | 3002.3±33.6Aa | 2966.9±8.1Aa  | 2908.2±25.1Aa | 2906±13.3Aa   | 2903.1±56.9Aa | 2883.6±25Aa   |
| Carboxylic acids          |               |               |               |               |               |               |
| Acetic acid               | 54±2.6Aab     | 53.3±4.4Bab   | 55±2Cab       | 59.5±4.4Aa    | 57.4±2.3Aa    | 48.1±3.3Ab    |
| Butanoic acid             | 430.2±15.8Aa  | 430.1±18.6Aa  | 432.5±16.7Aa  | 439.1±11.1Aa  | 439.7±21.9Aa  | 444.8±10.3Aa  |
| Hexanoic acid             | 239±9.7Aa     | 242.1±4.4Aa   | 237.2±4.1Aa   | 244.6±9.6Aa   | 250.4±0.2Aa   | 258.1±20.7Aa  |
| Octanoic acid             | 20.6±1.5Bab   | 19.2±1.9Bb    | 22.2±2Aab     | 22.3±1.9Aab   | 23.8±1.1ABa   | 19.8±1.2Aab   |
| Sum of carboxylic acids   | 743.9±18.8Aa  | 744.7±19.7Aa  | 746.9±17.4Aa  | 765.5±15.4Aa  | 771.3±22Aa    | 770.7±23.4Aa  |
| Others                    |               |               |               |               |               |               |
| 2-Heptanone               | 19.3±1.3Bb    | 17.5±0.6Bcd   | 21.1±0.4Bab   | 18.7±0.6Abc   | 23.1±1.7Aa    | 15.1±0.7Bd    |
| Ethylbenzene              | 493.9±18.3Aa  | 490.3±9.5Aa   | 494.9±16.1Aa  | 495.2±10.7Aa  | 484.3±8.3Aa   | 490.1±22.2Aa  |
| Methional                 | 5.2±0.2Ab     | 4.3±0.6Ab     | 6.0±0.8Aab    | 6.2±0.7Aab    | 6.7±0Aa       | 7.0±0.5Aa     |
| Eugenol                   | 160±9.5Aa     | 162.1±12.3Aa  | 157.1±8Aa     | 159.3±10.1Ba  | 152.6±8.8Ba   | 154.9±7.9Aa   |
| Sum of volatile compounds | 5295.1±47.5Aa | 5232.7±26.4Aa | 5173.2±35.7Aa | 5210.6±26.1Aa | 5203±65.4Aa   | 5234.4±41.8Aa |

#### PEP1

|                     |              |             |              |              |              |               |
|---------------------|--------------|-------------|--------------|--------------|--------------|---------------|
| Aldehydes           |              |             |              |              |              |               |
| Pentanal            | 26.5±1.6Ac   | 36.7±2.7Aa  | 17.9±1.2Cd   | 20.2±1.2Cd   | 26.5±0.1Bc   | 30.7±1.4Bb    |
| Hexanal             | 5.2±0.2Bd    | 9.0±0.7Ac   | 9.9±0.2Bc    | 9.9±0.2Bc    | 19.5±0.5Ab   | 20.8±0.7Ba    |
| (E)-2-Hexenal       | 420.5±19.1Aa | 406.8±1.5Aa | 391.4±15.3Aa | 397.6±12.8Aa | 391.9±4.1Aa  | 391.4±30.1Aa  |
| (E)-2-Heptenal      | 10.1±0.9Ac   | 10.3±0.7Ac  | 10.6±1.0Bc   | 10.6±0.8Bc   | 31±4.9Ab     | 39.1±1.2Ba    |
| Nonanal             | 1.8±0.1Ab    | 1.5±0.1Ab   | 1.6±0.2Ab    | 1.7±0.1Ab    | 1.8±0.3Bb    | 2.6±0.6Ba     |
| Benzaldehyde        | 8.8±0.4Aa    | 8.0±0.3Aab  | 7.8±0.4Aabc  | 7.8±0.1Babc  | 7.3±0.0Bbc   | 7.0±0.6Bc     |
| Sum of aldehydes    | 472.8±19.1Aa | 472.3±3.3Ba | 439.1±15.4Aa | 447.9±12.9Aa | 478±6.4Aa    | 491.6±30.2ABa |
| Alcohols            |              |             |              |              |              |               |
| 3-Methyl-1-butanol  | 17±0.4Aa     | 18.6±3.2Aa  | 18.2±0.3Aa   | 18.1±0.6Aa   | 18.4±0.1Aa   | 17.3±1.2Aa    |
| 1-Pentanol          | 56.2±1.3Aa   | 45.2±0.5Ab  | 31.6±0.7Bd   | 35.7±0.6Ad   | 39.1±0.6Ac   | 33.9±5Ad      |
| 1-Octen-3-ol        | 175.1±12Aa   | 177.7±3.9Aa | 176.9±16.4Aa | 176.8±14.9Aa | 171.2±9.3ABa | 171.2±45.2Aa  |
| 1-Hexanol           | 22.6±0.5Aab  | 24.4±1.0Aa  | 18.7±1.4Bb   | 22.7±1.1Aab  | 22.1±0.6Aab  | 20.3±1.8Ab    |
| Benzyl alcohol      | 10.5±0.5Aa   | 10.1±0.0Aa  | 9.7±0.6Aab   | 9±0.4Aab     | 8.7±1.3Aab   | 8.2±0.3Bb     |
| Phenylethyl alcohol | 8.4±0.4Aa    | 7.7±0.1Aab  | 6.4±0.4Bb    | 7.2±0.1Bab   | 7.0±0.1Bb    | 7.5±1Aab      |
| Sum of alcohols     | 289.7±12.1Aa | 283.7±5.2Aa | 261.4±16.5Aa | 269.6±15Aa   | 266.5±9.4Aa  | 258.2±45.5Aa  |
| Esters              |              |             |              |              |              |               |
| Methyl butanoate    | 21.3±1.1Aa   | 22.6±0.5Aa  | 22.5±0.4Aa   | 22.4±1.5Aa   | 21.1±0.3Aa   | 23.3±0.7Aa    |
| Ethyl butanoate     | 40.2±0.9Cd   | 50.1±2.2Bb  | 50.8±3.6Bb   | 58.8±3.7Ba   | 46.3±2.1Bc   | 42.1±4.2Bd    |
| Ethyl hexanoate     | 53.6±2.9Aa   | 50.3±4.8Aa  | 50.3±2.7Aa   | 50±2.4Ba     | 52.7±3.7Aa   | 55.4±2.3Aa    |
| Ethyl octanoate     | 8.1±0.5Ba    | 9.4±0.7Aa   | 10.0±1.4Aa   | 9.1±0.3Aa    | 9.4±0.2Aa    | 8.9±0.7Aa     |
| Sum of esters       | 123.2±3.3Aa  | 132.3±5.3Aa | 133.5±4.7Aa  | 140.2±4.7Aa  | 129.5±4.3Aa  | 129.6±4.9Aa   |

|                           |                     |                     |                     |                     |                     |                     |
|---------------------------|---------------------|---------------------|---------------------|---------------------|---------------------|---------------------|
| Terpenes                  |                     |                     |                     |                     |                     |                     |
| $\alpha$ -Pinene          | 259 $\pm$ 3.2Ba     | 243 $\pm$ 2.3Ba     | 245.9 $\pm$ 3.3Aa   | 247.9 $\pm$ 15.3Aa  | 249.4 $\pm$ 2.7Aa   | 234.5 $\pm$ 11.3Aa  |
| Camphene                  | 19.6 $\pm$ 0.2Ab    | 20.5 $\pm$ 0.1Ab    | 18.9 $\pm$ 0.6Bb    | 22.8 $\pm$ 0.4Aa    | 19.5 $\pm$ 0.1Ab    | 20.5 $\pm$ 1.5Ab    |
| $\beta$ -Pinene           | 191.4 $\pm$ 3.1Aa   | 147 $\pm$ 2.6Bd     | 192.3 $\pm$ 4.5Aa   | 187.7 $\pm$ 6.4Aa   | 168.4 $\pm$ 7.2Cb   | 153.5 $\pm$ 4.5Bc   |
| $\beta$ -Thujene          | 113.9 $\pm$ 1.6Ac   | 124.9 $\pm$ 0.2Abc  | 132.4 $\pm$ 1.4Aab  | 126.3 $\pm$ 3.8Abc  | 126.4 $\pm$ 5.5Abc  | 140.3 $\pm$ 9.6Aa   |
| Sabinene                  | 108.8 $\pm$ 1.9Cc   | 140.1 $\pm$ 0.5Aa   | 133.1 $\pm$ 5.5Aab  | 138.5 $\pm$ 0.5Aab  | 120.8 $\pm$ 6.4Ab   | 119 $\pm$ 11.1Abc   |
| $\beta$ -Myrcene          | 447.7 $\pm$ 18.2Aa  | 417.2 $\pm$ 22.8Ba  | 419.4 $\pm$ 39.5Aa  | 442.1 $\pm$ 29.2Aa  | 444.7 $\pm$ 14.2Aa  | 416.5 $\pm$ 4.5Aa   |
| Limonene                  | 126.6 $\pm$ 4.4ABab | 136 $\pm$ 3.3Ba     | 91.1 $\pm$ 7.9Be    | 101.2 $\pm$ 6.9Cab  | 118.4 $\pm$ 3.5Bbc  | 116.5 $\pm$ 8Bcd    |
| Eucalyptol                | 648.3 $\pm$ 11.3Aa  | 647.7 $\pm$ 9.2Aa   | 623.4 $\pm$ 26.1Aab | 619.1 $\pm$ 20.6Aab | 603.7 $\pm$ 8.7Bb   | 622.2 $\pm$ 10.9Aab |
| $\beta$ -Ocimene          | 261.8 $\pm$ 5.8ABa  | 261.6 $\pm$ 8.8ABa  | 260.7 $\pm$ 24.7Aa  | 263.2 $\pm$ 19.1Aa  | 281.7 $\pm$ 10.7Aa  | 272.9 $\pm$ 6.2Aa   |
| Terpinolene               | 27.3 $\pm$ 1.7Ab    | 25.2 $\pm$ 0.8Abc   | 23 $\pm$ 1.5Bc      | 31.4 $\pm$ 0.6Aa    | 20.8 $\pm$ 0.2Bcd   | 19.1 $\pm$ 1.6Ad    |
| Linalool                  | 781.5 $\pm$ 15Aa    | 790.6 $\pm$ 12.9Aa  | 794.6 $\pm$ 25.5Aa  | 779.7 $\pm$ 25.8Aa  | 763 $\pm$ 13.2Aa    | 755.9 $\pm$ 16.7Aa  |
| Sum of terpenes           | 2985.7 $\pm$ 27.7Aa | 2953.7 $\pm$ 29.6Aa | 2934.7 $\pm$ 60.2Aa | 2959.9 $\pm$ 51.4Aa | 2916.8 $\pm$ 26.7Aa | 2870.9 $\pm$ 29.8Aa |
| Carboxylic acids          |                     |                     |                     |                     |                     |                     |
| Acetic acid               | 59.2 $\pm$ 3.1Ab    | 66.5 $\pm$ 1.6Aa    | 67.6 $\pm$ 1Aa      | 52.9 $\pm$ 0.5Ac    | 50.8 $\pm$ 0.2Bc    | 41.6 $\pm$ 2.4Bd    |
| Butanoic acid             | 433.8 $\pm$ 19Aa    | 429.4 $\pm$ 13.2Aa  | 430 $\pm$ 17.6Aa    | 436.2 $\pm$ 12.5Aa  | 438.5 $\pm$ 16.3Aa  | 442.9 $\pm$ 13.7Aa  |
| Hexanoic acid             | 235.1 $\pm$ 2.8Aab  | 229.9 $\pm$ 6.5Ab   | 234.3 $\pm$ 4.4Aab  | 234.4 $\pm$ 4.9Aab  | 237 $\pm$ 12.5Aab   | 255.1 $\pm$ 12.7Aa  |
| Octanoic acid             | 26.1 $\pm$ 2.0Aa    | 21.2 $\pm$ 1.8Bb    | 23.7 $\pm$ 0.7Aab   | 22.6 $\pm$ 0.7abc   | 20.7 $\pm$ 1.0Bc    | 19.4 $\pm$ 1.1Ac    |
| Sum of carboxylic acids   | 754.2 $\pm$ 19.6Aa  | 746.9 $\pm$ 14.9Aa  | 755.5 $\pm$ 18.2Aa  | 746.1 $\pm$ 13.4Aa  | 747 $\pm$ 20.6Aa    | 759 $\pm$ 18.9Aa    |
| Others                    |                     |                     |                     |                     |                     |                     |
| 2-Heptanone               | 22.9 $\pm$ 1Aa      | 20.1 $\pm$ 1Bab     | 22 $\pm$ 1.8Ba      | 20.4 $\pm$ 1Aab     | 22.8 $\pm$ 1Aa      | 17.6 $\pm$ 1.9Bb    |
| Ethylbenzene              | 414.8 $\pm$ 9.5Bb   | 477.1 $\pm$ 16.5Aa  | 480.6 $\pm$ 21Aa    | 484.7 $\pm$ 25.9Aa  | 476.4 $\pm$ 13Aa    | 475.8 $\pm$ 20.2Aa  |
| Methional                 | 6.4 $\pm$ 0.6Aa     | 5.8 $\pm$ 1.3Aa     | 5.2 $\pm$ 0.4Aa     | 5.7 $\pm$ 0.3Aa     | 5.9 $\pm$ 0.5Aa     | 6.1 $\pm$ 0.0Ba     |
| Eugenol                   | 176.5 $\pm$ 12.8Aab | 176.1 $\pm$ 11.6Aab | 173.4 $\pm$ 9.9Aab  | 182.1 $\pm$ 6.3Aa   | 159.5 $\pm$ 5.3ABab | 153 $\pm$ 2.6Ab     |
| Sum of volatile compounds | 5246.3 $\pm$ 43.9Aa | 5268 $\pm$ 39.6Aa   | 5205.5 $\pm$ 71Aa   | 5256.6 $\pm$ 62.8Aa | 5202.3 $\pm$ 38.5Aa | 5161.7 $\pm$ 68.4Aa |
| PEP2                      |                     |                     |                     |                     |                     |                     |
| Aldehydes                 |                     |                     |                     |                     |                     |                     |
| Pentanal                  | 17.1 $\pm$ 1.1Cb    | 30.4 $\pm$ 3.1Ba    | 34 $\pm$ 0.4Aa      | 33.1 $\pm$ 1.4Aa    | 30.8 $\pm$ 2.3Aa    | 35 $\pm$ 0.8Aa      |
| Hexanal                   | 6.1 $\pm$ 0.3Ab     | 10.1 $\pm$ 1.3Aa    | 10.4 $\pm$ 0.1Ba    | 10.8 $\pm$ 0.1Ba    | 11.2 $\pm$ 0.2Ba    | 12.8 $\pm$ 0.7Ca    |
| (E)-2-Hexenal             | 397.9 $\pm$ 11.2Aa  | 385.2 $\pm$ 7.2Bab  | 381.9 $\pm$ 7.2Aab  | 375.8 $\pm$ 10.7Aab | 372.5 $\pm$ 2.2Ab   | 374.7 $\pm$ 11.4Aab |
| (E)-2-Heptenal            | 8.1 $\pm$ 0.5Bd     | 11.1 $\pm$ 0.5Ac    | 21.3 $\pm$ 0.4Ab    | 12.8 $\pm$ 1.8ABc   | 25 $\pm$ 1ABa       | 25.9 $\pm$ 1.2Ca    |
| Nonanal                   | 1.7 $\pm$ 0.1Aa     | 1.7 $\pm$ 0.1Aa     | 1.7 $\pm$ 0.3Aa     | 1.8 $\pm$ 0.1Aa     | 1.7 $\pm$ 0.2Ba     | 2.0 $\pm$ 0.0Ba     |
| Benzaldehyde              | 8.7 $\pm$ 0.3Aa     | 8.3 $\pm$ 0.4Aa     | 8.8 $\pm$ 0.5Aa     | 8.7 $\pm$ 0.1Aa     | 8.7 $\pm$ 0.4Aa     | 8.8 $\pm$ 0.2Aa     |
| Sum of aldehydes          | 439.6 $\pm$ 11.3Aa  | 446.7 $\pm$ 8Aa     | 458 $\pm$ 7.2Aa     | 442.9 $\pm$ 11Aa    | 449.9 $\pm$ 3.4Aa   | 459 $\pm$ 11.6Ba    |
| Alcohols                  |                     |                     |                     |                     |                     |                     |
| 3-Methyl-1-butanol        | 18.4 $\pm$ 1.2Aa    | 17.4 $\pm$ 0.5Aa    | 17.5 $\pm$ 0Ba      | 17.7 $\pm$ 0.1Aa    | 17 $\pm$ 1.9Aa      | 17.3 $\pm$ 1.3Aa    |
| 1-Pentanol                | 39.2 $\pm$ 0.8Ba    | 36.6 $\pm$ 0.6Bab   | 34.8 $\pm$ 0.4Abc   | 34.7 $\pm$ 0.8ABbc  | 35.4 $\pm$ 0.3Bbc   | 34.4 $\pm$ 1.2Ac    |

|                           |               |               |               |                |               |               |
|---------------------------|---------------|---------------|---------------|----------------|---------------|---------------|
| 1-Octen-3-ol              | 180.3±8.6Aa   | 174.1±8.6Aa   | 174.9±3.9Aa   | 175.2±11.2Aa   | 167.1±3.6Ba   | 167.3±4.3Aa   |
| 1-Hexanol                 | 22.5±1Aab     | 24.5±0.6Aa    | 21.2±0.1Aab   | 20.3±1.4Bb     | 21.5±0.3Aab   | 20.7±2.5Ab    |
| Benzyl alcohol            | 10.6±0.5Aa    | 10±0.4Aa      | 10.7±0.2Aa    | 10±0.1Aa       | 10.3±0.4Aa    | 9.9±0.6Aa     |
| Phenylethyl alcohol       | 8.3±0.4Aa     | 8±0.5Aab      | 8.3±0.2Aa     | 8.2±0Aab       | 8.2±0.2Aab    | 7.3±0.4Ab     |
| Sum of alcohols           | 279.2±8.8Aa   | 270.5±8.6Aa   | 267.4±3.9Aa   | 266.1±11.3Aa   | 259.3±4.1Aa   | 256.8±5.4Aa   |
| Esters                    |               |               |               |                |               |               |
| Methyl butanoate          | 21.8±1.2Aa    | 21.1±0.2Ba    | 22.9±1.3Aa    | 20.7±2Aa       | 20.5±0.7Aa    | 21.3±1ABa     |
| Ethyl butanoate           | 58.6±3.0Ab    | 60.9±1.0Aab   | 64.3±0.1Aa    | 63.7±0.1ABa    | 57.5±0.3Ac    | 54.5±3.5Ac    |
| Ethyl hexanoate           | 53.6±4.1Aab   | 50.1±4.8Aab   | 53.3±2.1Aab   | 59.3±4.1Aa     | 47.4±1.6Ab    | 46.5±2.2Bb    |
| Ethyl octanoate           | 11.3±0.9Aa    | 8.7±2.1Aab    | 8.0±0.9Ab     | 8.0±0.5Bb      | 8.2±0.1Ab     | 8.6±0.1Aab    |
| Sum of esters             | 145.3±5.3Ba   | 140.7±5.4Ab   | 148.5±2.6Bb   | 151.7±4.6Ab    | 133.6±1.8Ab   | 130.8±4.3Ab   |
| Terpenes                  |               |               |               |                |               |               |
| α-Pinene                  | 230.1±9.6Ca   | 229.9±1Ca     | 230.2±12.6Aa  | 239.5±0.3Aa    | 228.2±0.1Ca   | 225.3±2.9Aa   |
| Camphene                  | 16.6±0.3Cb    | 17.3±0.3Bb    | 20.8±0.5Aa    | 20±0.2Ba       | 18.1±0Bb      | 17.9±0.9Ab    |
| β-Pinene                  | 178.5±4.3Ba   | 185.4±0.5Aa   | 196.7±9.8Aa   | 186.2±1.7Aa    | 185.6±0.3Ba   | 187.5±10.4Aa  |
| β-Thujene                 | 113±1.5Aa     | 127.4±3.3Aa   | 105.8±1.5Ca   | 104.9±0.6Ba    | 103.9±8.2Ba   | 100.3±4.9Ba   |
| Sabinene                  | 117.8±2.1Ba   | 113.4±1.5Cab  | 103.4±3.9Cb   | 106.2±1.9Cb    | 117±0.1Aa     | 110.6±7.9Aab  |
| β-Myrcene                 | 468.6±34.2Aa  | 473.7±22.9Aa  | 428.4±7.5Aa   | 427.0±33.2Aa   | 428.4±2Aa     | 435.1±22.7Aa  |
| Limonene                  | 114.5±7.2Bb   | 112.5±4.1Cb   | 136.5±1.2Aa   | 126.9±7.2Aab   | 136.8±0.4Aa   | 134.1±6.8Aa   |
| Eucalyptol                | 637.4±18.3Aa  | 620.7±13.9Ba  | 658±7.1Aa     | 646.1±9.0Aa    | 650.9±0.5Aa   | 649±26.5Aa    |
| β-Ocimene                 | 289.6±16Aa    | 297.8±14.8Aa  | 234.8±8.7Ab   | 244.5±12.8Ab   | 233.1±4.8Bb   | 240.5±13.9Bb  |
| Terpinolene               | 25.1±1.2Ab    | 19.8±2.3Bc    | 29.5±1.5Aa    | 31.7±1.4Aa     | 24.2±1.3Ab    | 18.4±0.4Ac    |
| Linalool                  | 789.2±19.5Aa  | 772.6±61.1Aa  | 776±35.8Aa    | 771.5±7.8Aa    | 779.2±0.9Aa   | 774.2±6.8Aa   |
| Sum of terpenes           | 2980.5±48Aa   | 2970.5±68.6Aa | 2920.1±41.7Aa | 2904.3±38.3Aa  | 2905.3±9.9Aa  | 2892.8±41.3Aa |
| Carboxylic acids          |               |               |               |                |               |               |
| Acetic acid               | 60.1±1.7Aa    | 58.4±4.5Bab   | 59.6±1.8Bab   | 60.1±4.4Aa     | 55.3±0.3Abc   | 49.1±2.4Ac    |
| Butanoic acid             | 425.3±16.5Aa  | 428±17.7Aa    | 422.5±2.7Aa   | 424.1±11.8Aa   | 434.1±22.4Aa  | 447.9±28Aa    |
| Hexanoic acid             | 233.2±13.8Aa  | 237.7±18.5Aa  | 236.2±7.6Aa   | 233.4±0.6Aa    | 234.5±8Aa     | 241±11.3Aa    |
| Octanoic acid             | 23.2±1.2ABb   | 29.9±1.2Aa    | 25.1±2.4Aab   | 23.5±2.8b      | 26.2±2.4Aab   | 20.8±0.9Ac    |
| Sum of carboxylic acids   | 741.8±21.6Aa  | 754±26Aa      | 743.4±8.6Aa   | 741.1±12.9Aa   | 750±23.9Aa    | 758.8±30.3Aa  |
| Others                    |               |               |               |                |               |               |
| 2-Heptanone               | 21.4±1.3ABab  | 24.4±1.5Aa    | 24±0.4Aab     | 20.2±0.7Ab     | 21.6±1.0Aab   | 20.8±2.8Aab   |
| Ethylbenzene              | 417.1±14.3Bb  | 407.1±11.5Bc  | 412.1±13.1Bb  | 422.1±12.6Babc | 457.3±14.3Aab | 463.5±27.5Aa  |
| Methional                 | 6.3±0.6Aa     | 6.0±0.4Aa     | 6.3±0.2Aa     | 6.8±0.4Aa      | 6.6±0.6Aa     | 7.2±0.2Aa     |
| Eugenol                   | 180.6±0.6Aa   | 177.3±11.5Aa  | 175.1±14.6Aa  | 175.7±8.5ABa   | 180±15.4Aa    | 163.3±9.1Aa   |
| Sum of volatile compounds | 5211.8±56.7Aa | 5197.4±76.2Aa | 5154.8±47.7Aa | 5130.8±46.2Aa  | 5163.6±33.9Aa | 5153.0±60.4Aa |

\* Results are the mean of two independent analytical determinations ± standard deviation. Different capital letters (A–C) in the column within each storage day represent significant differences among

the formulations ( $p < 0.05$ ); different lowercase letters (a–d) in the row within each formulation represent significant differences as a function of storage days after opening ( $p < 0.05$ ). Legend: CTRL, control plus 0.06 g ascorbic acid/kg pesto and 1 g sorbic acid/kg pesto; PEP1, plus PE corresponding to 250 mg phenols/kg pesto; and PEP2, plus PE corresponding to 500 mg phenols/kg pesto.

**Table S6.** Colour variation ( $\Delta E$ ) in pesto samples during the SSL (at opening (day 0) and 3 and 7 days of storage after opening).

| Days of storage | CTRL vs. PEP1 | CTRL vs. PEP2 | PEP1 vs. PEP2 |
|-----------------|---------------|---------------|---------------|
| 0               | 2.0 $\pm$ 0.1 | 1.6 $\pm$ 0.1 | 0.6 $\pm$ 0.0 |
| 3               | 3.8 $\pm$ 0.0 | 0.3 $\pm$ 0.0 | 3.8 $\pm$ 0.1 |
| 7               | 2.3 $\pm$ 0.0 | 6.0 $\pm$ 0.0 | 4.0 $\pm$ 0.0 |

The results are the mean of two independent analytical determinations  $\pm$  standard deviation. Legend: CTRL, control plus 0.06 g of ascorbic acid/kg of pesto and 1 g of sorbic acid/kg of pesto; PEP1, plus PE corresponding to 250 mg of phenols/kg of pesto; and PEP2, plus PE corresponding to 500 mg of phenols/kg of pesto.
